# Supplementary material for: Meta-Analysis of SNPs Determining Litter Traits in Pigs
Source: MDPI journal article supplement (doi:10.3390/genes13101730), 2022-09-26
Supplement: s1 [file s1]

## Supplementary information

Supplementary\_Method: The description of not published GWAS performed by Sell-Kubiak et al. [23]

Supplementary\_Tables: **Table S1.** SNPs associated with total number born in pigs with their location within pig genome (including chromosome - SSC, position and gene), alleles as well as breed in which the SNP was detected. **Table S2.** SNPs associated with number born alive in pigs with their location within pig genome (including chromosome - SSC, position and gene), alleles as well as breed in which the SNP was detected. **Table S3.** SNPs associated with number of stillborn in pigs with their location within pig genome (including chromosome - SSC, position and gene), alleles as well as breed in which the SNP was detected. **Table S4.** SNPs associated with litter birthweight in pigs with their location within pig genome (including chromosome, position and gene), alleles as well as breed in which the SNP was detected. **Table S5.** SNPs associated with corpus luteum number in pigs with their location within pig genome (including chromosome, position and gene), alleles as well as breed in which the SNP was detected. **Full references presented in Tables S1-S5.**
