# Supplementary material for: Meta-Analysis of SNPs Determining Litter Traits in Pigs
Source: Genes (Basel). 2022 Sep 26;13(10):1730. doi: 10.3390/genes13101730 (PMC9602383; doi:10.3390/genes13101730)
Supplement: Supplementary file 1 [file genes-13-01730-s001.zip › Supplementary_Tables.xlsx]

## Sheet: Table S1
Table S1. SNPs associated with total number born in pigs with their location within pig genome (including chromosome - SSC, position and gene), alleles as well as breed in which the SNP was detected.
Refsnp ID	SSC	Position	Allele	Ensembl Gene Stable ID	Gene name	Gene type	Breed	Author
<rs340630251 (+21 N)	1	3377960			PDE10A	Intergenic	Yorkshire	Wu et al., 2018a
<rs332646065 (+5 N)	1	3859573				Intergenic	Yorkshire	Wu et al., 2018a
<rs328840936 (-4 N)	1	4891063				Intergenic	Yorkshire	Wu et al., 2018a
rs80972494	1	7262020	A/C			Intergenic	Large White	Coster et al., 2012
rs80919544	1	11785233	A/G	ENSSSCG00000004065	TIAM2	Protein coding	Erhualian	He et al., 2017
rs80787893	1	14869534	T/C	ENSSSCG00000004090	ZBTB2	Protein coding	Large White	Sell-Kubiak et al., 2015
rs80851003	1	20072414	A/G			Intergenic	Erhualian	He et al., 2017
rs80970692	1	97934013	G/A	ENSSSCG00000028076	ZBTB7C	Protein coding	Large White	Y. Wang et al., 2018
<rs703082285 (+5 N)	1	117560058			UNC13C	Protein coding	Landrace	Wu et al., 2018a
	1	117560058				Intergenic	Landrace	Wu et al., 2018a
rs80845110	1	139993309	G/A	ENSSSCG00000035584	GABRG3	Protein coding	Large White	Coster et al., 2012
rs80933698	1	140097794	A/G	ENSSSCG00000035584	GABRG3	Protein coding	Large White	Coster et al., 2012
rs80869858	1	140178409	C/T	ENSSSCG00000035584	GABRG3	Protein coding	Large White	Coster et al., 2012
rs80999701	1	140290677	G/A	ENSSSCG00000035584	GABRG3	Protein coding	Large White	Coster et al., 2012
rs81348717	1	140463533	C/G	ENSSSCG00000035584	GABRG3	Protein coding	Large White	Coster et al., 2012
rs81348724	1	140550299	G/A	ENSSSCG00000004827	GABRA5	Protein coding	Large White	Coster et al., 2012
rs81348751	1	140808020	G/A	ENSSSCG00000038547	GABRB3	Protein coding	Large White	Coster et al., 2012
rs80989931	1	140896691	G/A	ENSSSCG00000038547	GABRB3	Protein coding	Large White	Coster et al., 2012
rs81348779	1	141989297	C/G	ENSSSCG00000004832	UBE3A	Protein coding	Large White	Coster et al., 2012
rs80912860	1	164637575	T/C			Intergenic	Large White	Sell-Kubiak et al., 2015
rs80956812	1	164674664	G/A	ENSSSCG00000004948	SMAD6	Protein coding	Large White	Sell-Kubiak et al., 2015
rs81267574	1	222278217	A/G	ENSSSCG00000027161	PIP5K1B	Protein coding	Erhualian	He et al., 2017
rs80938435	1	245222778	C/T			Intergenic	Erhualian	He et al., 2017
rs81296573	1	263022859	G/A			Intergenic	Erhualian	He et al., 2017
rs80913204	1	270166629	G/T	ENSSSCG00000005689	FNBP1	Protein coding	Erhualian	He et al., 2017
rs81330112	2	3058633	C/A	ENSSSCG00000031769	CTTN	Protein coding	Erhualian	He et al., 2017
rs81214065	2	7420349	G/A	ENSSSCG00000013022	PYGM	Protein coding	Erhualian	He et al., 2017
rs81474834	2	9252507	C/T	ENSSSCG00000036669		Protein coding	Erhualian	He et al., 2017
rs81273273	2	24914867	A/G	ENSSSCG00000013294	LDLRAD3	Protein coding	Erhualian	He et al., 2017
rs81356698	2	28380318	A/G	ENSSSCG00000013315	EIF3M	Protein coding	Large White	Coster et al., 2012
rs346316162	2	84269464	C/T	ENSSSCG00000014079	ANKRD31	Protein coding	Erhualian	He et al., 2017
rs81360234	2	85003252	T/G	ENSSSCG00000034062	SV2C	Protein coding	Erhualian	He et al., 2017
rs81219883	2	134661167	C/T	ENSSSCG00000014280	RAD50	Protein coding	Large White	Sato et al., 2016
rs81270902	2	136051929	T/G	ENSSSCG00000014293	FSTL4	Protein coding	Erhualian	He et al., 2017
rs81307772	2	142675693	T/C	ENSSSCG00000029281		Protein coding	Erhualian	He et al., 2017
rs81366836	2	145019988	T/C			Intergenic	Erhualian	He et al., 2017
rs81367208	2	146880995	C/T			Intergenic	Erhualian	He et al., 2017
rs81346993	2	148668538	A/G	ENSSSCG00000036549	DPYSL3	Protein coding	Erhualian	He et al., 2017
rs334519198	3	5376605	C/T	ENSSSCG00000007599	LMTK2	Protein coding	Large White	Y. Wang et al., 2018
rs81243084	3	14585248	G/T	ENSSSCG00000007727	AUTS2	Protein coding	Erhualian	He et al., 2017
rs81318451	3	20859502	C/T	ENSSSCG00000036837	HS3ST4	Protein coding	Erhualian	He et al., 2017
rs81319541	3	23688143	A/G	ENSSSCG00000027967	IGSF6	Protein coding	Erhualian	He et al., 2017
rs81379942	3	30034842	G/A	ENSSSCG00000032878	SHISA9	Protein coding	Erhualian	He et al., 2017
rs81369361	3	43227069	G/A			Intergenic	Large White	Y. Wang et al., 2018
rs334867206	3	43312168	C/T			Intergenic	Large White	Y. Wang et al., 2018
rs319494663	3	43463318	T/C	ENSSSCG00000018319	ssc-let-7a-2	miRNA	Large White	Y. Wang et al., 2018
	3	48643565			<ST6GAL2	Protein coding	Landrace	Wu et al., 2018a
rs338135576	3	52266739	C/T	ENSSSCG00000008162	IL1R1	Protein coding	Erhualian	He et al., 2017
rs81370592	3	53699303	T/C			Intergenic	Erhualian	He et al., 2017
rs81377897	3	124275280	A/G			Intergenic	Erhualian	He et al., 2017
rs81272059	3	125892592	A/G	ENSSSCG00000008635	NOL10	Protein coding	Erhualian	He et al., 2017
rs81319839	4	18194352	G/A			Intergenic	Large White	Y. Wang et al., 2018
rs81312912	4	18196598	G/A			Intergenic	Large White	Y. Wang et al., 2018
rs80986621	4	87990037	T/C	ENSSSCG00000006340	UAP1	Protein coding	Erhualian	He et al., 2017
rs80860510	4	89154886	G/A	ENSSSCG00000030318	SDHC	Protein coding	Erhualian	He et al., 2017
rs80987610	4	89242132	A/G	ENSSSCG00000006355	APOA2	Protein coding	Erhualian	He et al., 2017
rs80910021	4	96557774	T/C			Intergenic	Erhualian	He et al., 2017
rs80999559	4	98260992	T/C	ENSSSCG00000006644	CERS2	Protein coding	Erhualian	He et al., 2017
rs80927364	4	130597207	G/A	ENSSSCG00000040735	DDAH1	Protein coding	Erhualian	He et al., 2017
rs80927364	4	130597207	G/A	ENSSSCG00000040735	DDAH1	Protein_coding	Erhualian	Ma et al., 2018
rs81385465	5	4131296	A/G				Large White	Sell-Kubiak et al., 2015
rs336638152	5	11274122	T/A	ENSSSCG00000000144	TXN2	Protein coding	Duroc	Zhang et al., 2019
rs327336155	5	31752997	A/G			Intergenic	Large White	Y. Wang et al., 2018
rs80890539	5	49084918	C/T			Intergenic	Erhualian	He et al., 2017
rs80999110	5	65577418	G/T			Intergenic	Duroc	Zhang et al., 2019
rs328217833	5	78953555	T/C			Intergenic	Erhualian	He et al., 2017
rs81303269	5	79020148	G/A			Intergenic	Erhualian	He et al., 2017
rs81236331	6	4395948	G/T	ENSSSCG00000023837	WFDC1	Protein coding	Erhualian	He et al., 2017
rs81307446	6	4817058	C/T	ENSSSCG00000002684	CDH13	Protein coding	Erhualian	He et al., 2017
rs81393472	6	21728055	G/A			Intergenic	Erhualian	He et al., 2017
rs345476947	6	54042595	C/T	ENSSSCG00000003145	FUT2	Protein coding	Large White	H. Wang et al., 2018
rs81322640	6	74250906	C/T	ENSSSCG00000037676	KAZN	Protein coding	Erhualian	He et al., 2017
rs81283746	6	78467732	T/C	ENSSSCG00000003498	UBXN10	Protein coding	Erhualian	He et al., 2017
rs55618224	6	80088638	T/C	ENSSSCG00000003520	CDC42	Protein coding	Yorkshire	Liu et al., 2019
rs81318862	6	82375634	G/A			Intergenic	Duroc	Zhang et al., 2019
rs329711941	6	84156205	A/C	ENSSSCG00000003561	ZDHHC18	Protein coding	Duroc	Zhang et al., 2019
	6	124849459				Intergenic	Yorkshire	Wu et al., 2018a
	6	126162398				Intergenic	Yorkshire	Wu et al., 2018a
<rs319508558 (-4 N)	6	126477421				Intergenic	Yorkshire	Wu et al., 2018a
rs81391439	6	129931172	C/A			Intergenic	Erhualian	He et al., 2017
	6	132921533				Intergenic	Yorkshire	Wu et al., 2018a
rs342908929	6	159933806	C/T	ENSSSCG00000003863	ZFYVE9	Protein coding	Yorkshire	Li et al., 2020
rs81319462	6	163598597	A/G			Intergenic	Erhualian	He et al., 2017
rs81319428	6	163598619	T/C			Intergenic	Erhualian	He et al., 2017
rs80882306	7	11003222	A/G	ENSSSCG00000042180		Protein coding	Erhualian	Ma et al., 2018
rs80813007	7	21583296	A/G	ENSSSCG00000032465		pseudogene	Erhualian	He et al., 2017
rs80938431	7	22008244	A/G	ENSSSCG00000001202		Protein coding	Erhualian	He et al., 2017
rs80923434	7	24035603	T/C	ENSSSCG00000001422	C2	Protein coding	Large White	Sato et al., 2016
rs80933422	7	27905935	C/T			Intergenic	Erhualian	He et al., 2017
rs80797074	7	29268803	A/G	ENSSSCG00000001499	DST	Protein coding	Erhualian	He et al., 2017
rs340672537	7	38439290	G/T	ENSSSCG00000001680	ABCC10	Protein coding	Erhualian	He et al., 2017
rs81398070	7	58232894	T/C	ENSSSCG00000001880	SIN3A	Protein coding	Erhualian	He et al., 2017
rs80824208	7	63161681	T/G	ENSSSCG00000039317	SLC25A21	Protein coding	Erhualian	He et al., 2017
rs326644823	7	63618208	G/A			Intergenic	Erhualian	He et al., 2017
rs80867596	7	70133128	T/G	ENSSSCG00000047109		Protein coding	Erhualian	He et al., 2017
rs80891106	7	73467314	G/A			Intergenic	Erhualian	He et al., 2017
rs81295302	7	74333495	C/T	ENSSSCG00000001977	STXBP6	Protein coding	Erhualian	He et al., 2017
rs81398127	7	75705436	A/G	ENSSSCG00000002028	CMTM5	Protein coding	Erhualian	He et al., 2017
rs336977324	7	81077680	C/T	ENSSSCG00000033958	RYR3	Protein coding	Erhualian	He et al., 2017
rs80927564	7	108030803	T/C			Intergenic	Erhualian	He et al., 2017
rs80942529	7	110057727	A/G			Intergenic	Erhualian	He et al., 2017
rs81403620	8	15474371	C/T	ENSSSCG00000023934	KCNIP4	Protein coding	Erhualian	He et al., 2017
rs81405013	8	16400498	T/C			Intergenic	Erhualian	He et al., 2017
rs81342198	8	16560870	T/C			Intergenic	Erhualian	He et al., 2017
rs81406385	8	17783561	T/C			Intergenic	Erhualian	He et al., 2017
rs81406385	8	17783561	T/C	ENSSSCG00000045167		Protein coding	Erhualian	Ma et al., 2018
rs81343566	8	18863902	A/C	ENSSSCG00000023001	CCDC149	Protein coding	Erhualian	He et al., 2017
rs81399474	8	32370687	T/C	ENSSSCG00000022945	UCHL1	Protein coding	Erhualian	He et al., 2017
rs81399527	8	32800253	A/G			Intergenic	Erhualian	He et al., 2017
<rs1109153954 (-2 N)	8	32892624				Intergenic	Landrace	Wu et al., 2018a
	8	32980969				Intergenic	Landrace	Wu et al., 2018a
<rs695538891 (-5 N)	8	33178015			BEND4	Intergenic	Landrace	Wu et al., 2018a
rs81399633	8	33508704	G/A	ENSSSCG00000008803	ATP8A1	Protein coding	Erhualian	He et al., 2017
rs81227962	8	34380373	G/A			Intergenic	Erhualian	He et al., 2017
rs81476987	8	34885027	T/C	ENSSSCG00000035712	KCTD8	Protein coding	Erhualian	He et al., 2017
rs81399897	8	36628170	A/C			IncRNA	Erhualian	He et al., 2017
rs81400131	8	38946698	C/A	ENSSSCG00000008830	CWH43	Protein coding	Erhualian	He et al., 2017
	8	44778190			<CTSO (+13149)	Protein coding	Landrace	Wu et al., 2018a
rs81400868	8	63262973	G/A	ENSSSCG00000019754	U6	snRNA	Erhualian	He et al., 2017
rs81401375	8	73118551	G/A			Intergenic	Erhualian	He et al., 2017
rs339466191	8	80345448	T/A	ENSSSCG00000037766	NR3C2	Protein coding	Landrace/ Yorkshire	Wu et al., 2018b
rs333905163	8	80589152	G/A	ENSSSCG00000037766	NR3C2	Protein coding	Landrace/ Yorkshire	Wu et al., 2018b
<rs786732979 (+6 N)	8	84823302			INPP4B	Intergenic	Landrace	Wu et al., 2018a
rs81294311	8	88225561	C/T			Intergenic	Erhualian	He et al., 2017
rs319272490	8	103706053	T/C			Intergenic	Landrace/ Yorkshire	Wu et al., 2018b
rs81403286	8	107008700	G/T			Intergenic	Erhualian	He et al., 2017
rs81403527	8	112530303	G/A	ENSSSCG00000009140	CASP6	Protein coding	Erhualian	He et al., 2017
rs81403538	8	112566311	C/T	ENSSSCG00000009141	MCUB	Protein coding	Erhualian	He et al., 2017
rs334180816	8	115856336	T/C	ENSSSCG00000038801	NPNT	Protein coding	Landrace/ Yorkshire	Wu et al., 2018b
rs80834695	8	120291881	G/A			Intergenic	Erhualian	He et al., 2017
rs81317149	8	127090631	A/G				Large White	Sell-Kubiak et al., 2015
rs81214162	8	131078336	G/A		SPP1-201 (OPN)	Protein coding	Large White	Kumchoo and Mekchay, 2015
rs81509053	8	131079315	A/G		SPP1-201 (OPN)	Protein coding	Large White	Kumchoo and Mekchay, 2015
rs81509049	8	131079463	C/T		SPP1-201 (OPN)	Protein coding	Large White	Kumchoo and Mekchay, 2015
rs81413855	9	8393770	A/G	ENSSSCG00000014835	C2CD3	Protein coding	Erhualian	He et al., 2017
	9	8567876			PPME1	Protein coding	Yorkshire	Wu et al., 2018a
rs81416386	9	11655571	A/G	ENSSSCG00000014876	MYO7A	Protein coding	Erhualian	He et al., 2017
rs81407589	9	21695319	A/C			Intergenic	Erhualian	He et al., 2017
rs81408950	9	34248222	A/G			Intergenic	Erhualian	He et al., 2017
rs81409102	9	35438101	T/C	ENSSSCG00000030565	GRIA4	Protein coding	Erhualian	He et al., 2017
rs81413928	9	84593678	G/A	ENSSSCG00000015356	AGMO	Protein coding	Landrace	Uimari et al., 2011
rs81413949	9	85057918	T/C				Landrace	Uimari et al., 2011
rs81287478	9	85128043	C/T			Intergenic	Landrace	Uimari et al., 2011
rs81223525	9	85362483	A/G			Intergenic	Landrace	Uimari et al., 2011
rs81260290	9	87932749	A/G	ENSSSCG00000015368	HDAC9	Protein coding	Erhualian	Ma et al., 2018
rs81414623	9	96283483	T/C	ENSSSCG00000015398	SEMA3A	Protein coding	Erhualian	He et al., 2017
rs81300575	9	102308556	C/T	ENSSSCG00000015410	PHTF2	Protein coding	Landrace	Uimari et al., 2011
rs81415849	9	112728361	C/T	ENSSSCG00000041559		Protein coding	Yorkshire	Uzzaman et al., 2018
rs81331059	9	137095797	A/G			Intergenic	Erhualian	He et al., 2017
rs81419264	9	137162279	A/G			Intergenic	Erhualian	He et al., 2017
rs81419315	9	137216947	A/G	ENSSSCG00000039253	U6	snRNA	Erhualian	He et al., 2017
rs81315852	9	138107624	G/T			Intergenic	Erhualian	He et al., 2017
rs81332239	9	138462123	T/C			Intergenic	Erhualian	He et al., 2017
	9	143554876				Intergenic	Landrace	Wu et al., 2018a
<rs791155231 (+2 N)	10	5869525				Intergenic	Yorkshire	Wu et al., 2018a
rs81429231	10	10002753	A/G	ENSSSCG00000010825	MARK1	Protein coding	Erhualian	He et al., 2017
<rs342968986 (-10 N)	10	11907979				Intergenic	Yorkshire	Wu et al., 2018a
rs80895456	10	26509297	G/T			Intergenic	Erhualian	He et al., 2017
<rs706369176( +14 N)	10	32050819		ENSSSCG00000038162	CCL21	Intergenic	Yorkshire	Wu et al., 2018a
	10	32125691				Intergenic	Yorkshire	Wu et al., 2018a
<rs697620233 (+8 N)	10	32375749			MYORG	Intergenic	Yorkshire	Wu et al., 2018a
rs1110502678	10	32569875		ENSSSCG00000021761	UBAP1	Protein coding	Yorkshire	Wu et al., 2018a
<rs323237879 (-1 N)	10	32645278				Intergenic	Yorkshire	Wu et al., 2018a
	10	40932496				Intergenic	Yorkshire	Wu et al., 2018a
rs341908955	10	48658434	C/T			Intergenic	Erhualian	He et al., 2017
rs81329283	10	56421545	G/A	ENSSSCG00000011102	NRP1	Protein coding	Erhualian	He et al., 2017
rs81274366	10	57593745	A/G	ENSSSCG00000011103	PARD3	Protein coding	Erhualian	Ma et al., 2018
rs81426281	10	57913635	C/T			Intergenic	Erhualian	He et al., 2017
rs81314128	10	59665035	C/T			Intergenic	Erhualian	He et al., 2017
rs80941850	11	8940153	C/T	ENSSSCG00000009341		Protein coding	Erhualian	He et al., 2017
rs81477765	11	19542650	A/G			Intergenic	Erhualian	He et al., 2017
rs81332839	11	19542846	C/T			Intergenic	Erhualian	He et al., 2017
rs81285980	11	19544324	G/A			Intergenic	Erhualian	He et al., 2017
rs81237348	11	22281193	T/C	ENSSSCG00000009420	NUFIP1	Protein coding	Erhualian	He et al., 2017
rs80989787	11	23362846	C/T	ENSSSCG00000021818	ENOX1	Protein coding	Large White	Sell-Kubiak et al., 2015
rs81289355	11	23410214	T/C	ENSSSCG00000021818	ENOX1	Protein coding	Large White	Sell-Kubiak et al., 2015
rs81293918	11	27751988	G/A			Intergenic	Erhualian	He et al., 2017
rs80813604	11	48641897	T/C			Intergenic	Erhualian	He et al., 2017
rs80950312	11	48749391	C/T			Intergenic	Erhualian	He et al., 2017
rs80869156	11	64316157	A/G			Intergenic	Erhualian	He et al., 2017
rs81329621	11	66354904	T/G			Intergenic	Erhualian	He et al., 2017
rs81343376	12	6971812	A/G			Intergenic	Erhualian	He et al., 2017
rs81332319	12	7414272	T/C			Intergenic	Erhualian	He et al., 2017
rs81439394	12	9810809	T/G			Intergenic	Duroc	Zhang et al., 2019
rs81214366	12	15395558	A/G	ENSSSCG00000017296	ACE	Protein coding	Large White	Sato et al., 2016
rs81311518	12	19735966	G/A	ENSSSCG00000017377		Protein coding	Yorkshire	Uzzaman et al., 2018
rs81433045	12	26992374	A/G	ENSSSCG00000038760	LUC7L3	Protein coding	Erhualian	He et al., 2017
rs81433877	12	33577229	A/G	ENSSSCG00000038505	MSI2	Protein coding	Erhualian	He et al., 2017
rs81434044	12	33799100	T/C	ENSSSCG00000038505	MSI2	Protein coding	Erhualian	He et al., 2017
rs81434064	12	33903675	G/A	ENSSSCG00000038505	MSI2	Protein coding	Erhualian	He et al., 2017
rs81434489	12	35993482	A/G	ENSSSCG00000017668	VMP1	Protein coding	Erhualian	He et al., 2017
rs81434499	12	36207006	T/G			Intergenic	Erhualian	He et al., 2017
rs81434499	12	36207006	T/G			Intergenic	Erhualian	Ma et al., 2018
rs81309004	12	40519573	C/T			Intergenic	Erhualian	He et al., 2017
rs81434931	12	40974978	G/A	ENSSSCG00000040177	ASIC2	Protein coding	Erhualian	He et al., 2017
	12	41107013		ENSSSCG00000040177	ASIC2	Intergenic	Yorkshire	Wu et al., 2018a
rs81435036	12	41338150	T/C	ENSSSCG00000040177	ASIC2	Protein coding	Erhualian	He et al., 2017
rs81477883	12	43427846	C/T	ENSSSCG00000017747	RAB11FIP4	Protein coding	Erhualian	He et al., 2017
	13	92819				Intergenic	Yorkshire	Wu et al., 2018a
rs81447979	13	11362350	G/A	ENSSSCG00000036033	THRB	Protein coding	Erhualian	He et al., 2017
<rs81482811 (+ 24 N)	13	13552924				Intergenic	Yorkshire	Wu et al., 2018a
	13	13791950		ENSSSCG00000011217	NEK10	Intergenic	Yorkshire	Wu et al., 2018a
rs80837222	13	13802573	C/T	ENSSSCG00000011217	NEK10	Protein coding	Erhualian	He et al., 2017
rs81445072	13	38880472	T/C	ENSSSCG00000030359	ARHGEF3	Protein coding	Erhualian	He et al., 2017
rs80964445	13	75637294	T/G	ENSSSCG00000011645	CEP63	Protein coding	Erhualian	He et al., 2017
rs81447100	13	80866929	G/A	ENSSSCG00000011666	CLSTN2	Protein coding	Erhualian	He et al., 2017
	13	177784444		ENSSSCG00000012002	ROBO2	Intergenic	Yorkshire	Wu et al., 2018a
rs81441751	13	182451198	T/C	ENSSSCG00000012018	CHODL	Protein coding	Large White	Sell-Kubiak et al., 2015
rs81442196	13	190614395	A/G			Intergenic	Erhualian	He et al., 2017
rs80961068	13	200778735	C/T	ENSSSCG00000012062	TTC3	Protein coding	Large White	Y. Wang et al., 2018
rs80841768	14	12118215	C/T	ENSSSCG00000032600	PNOC	Protein coding	Erhualian	He et al., 2017
rs330621374	14	15126027	G/A			Intergenic	Landrace/ Yorkshire	Wu et al., 2018b
rs334650508	14	26675179	G/A			Intergenic	Erhualian	He et al., 2017
rs318344052	14	26907303	C/T			Intergenic	Erhualian	He et al., 2017
rs80979042	14	62040147	C/T	ENSSSCG00000010204	BICC1	Protein coding	Duroc	Zhang et al., 2019
rs80825112	14	62071531	G/A	ENSSSCG00000010204	BICC1	Protein coding	Duroc	Zhang et al., 2019
rs80892145	14	73289391	C/T	ENSSSCG00000010267	LRRC20	Protein coding	Erhualian	He et al., 2017
rs80960182	14	84555165	G/A			Intergenic	Erhualian	He et al., 2017
rs80873788	14	85481113	G/A	ENSSSCG00000010350	RGR	Protein coding	Erhualian	He et al., 2017
rs326833930	14	97104078	T/C	ENSSSCG00000010427	MBL2	Protein coding	Large White	Sato et al., 2016
rs80799654	14	98901034	C/T			Intergenic	Erhualian	He et al., 2017
rs80800806	14	104041994	C/T	ENSSSCG00000010470	IDE	Protein coding	Erhualian	He et al., 2017
rs80968475	14	107031142	G/T	ENSSSCG00000010494	SORBS1	Protein coding	Erhualian	He et al., 2017
rs80959797	14	107336340	A/G	ENSSSCG00000010497	ENTPD1	Protein coding	Erhualian	He et al., 2017
rs80938898	14	107377294	T/C	ENSSSCG00000010497	ENTPD1	Protein coding	Erhualian	He et al., 2017
rs80971725	14	107584405	T/C			Intergenic	Erhualian	He et al., 2017
rs80843720	14	107597908	C/T	ENSSSCG00000010503	ZNF518A	Protein coding	Erhualian	He et al., 2017
rs80987149	14	107725686	C/T			Intergenic	Erhualian	He et al., 2017
rs81449479	14	107794160	A/G	ENSSSCG00000010506	OPALIN	Protein coding	Erhualian	He et al., 2017
rs80867623	14	129792523	A/G	ENSSSCG00000010690	SEC23IP	Protein coding	Large White	Coster et al., 2012
rs80983641	14	137193623	A/G	ENSSSCG00000010755	PTPRE	Protein coding	Erhualian	He et al., 2017
	14	147794697			<ZNF236 (+12568)	Protein coding	Landrace	Wu et al., 2018a
	15	2453729				Intergenic	Landrace	Wu et al., 2018a
rs80868389	15	9150979	G/A			Intergenic	Erhualian	He et al., 2017
	15	39345382				Intergenic	Yorkshire	Wu et al., 2018a
rs80893476	15	82075550	T/C	ENSSSCG00000022222	MTX2	Protein coding	Erhualian	He et al., 2017
rs45435330	15	118847390	T/A	ENSSSCG00000035392	IGFBP2	Protein coding	Berkshire	An et al., 2018
<rs322435991 (+10 N)	16	5197665				Intergenic	Yorkshire	Wu et al., 2018a
	16	33937760				Intergenic	Yorkshire	Wu et al., 2018a
	16	40114954		ENSSSCG00000025194	ZSWIM6	Intergenic	Yorkshire	Wu et al., 2018a
rs81459026	16	41470716	A/G	ENSSSCG00000016938	IPO11	Protein coding	Erhualian	He et al., 2017
<rs339435501 (-30 N)	16	71480267			FAT2	Intergenic	Landrace	Wu et al., 2018a
rs81289648	16	74903886	G/A			Intergenic	Erhualian	Ma et al., 2018
rs81463092	16	74971494	A/G			Intergenic	Erhualian	He et al., 2017
	16	80248729				Intergenic	Yorkshire	Wu et al., 2018a
rs331119584	17	1486143	C/T	ENSSSCG00000006970	DLC1	Protein coding	Erhualian	He et al., 2017
<rs342335040(+ 7N)	17	3579607				Intergenic	Yorkshire	Wu et al., 2018a
<rs789190471 (+8N)	17	5916286				Intergenic	Yorkshire	Wu et al., 2018a
rs81472303	18	18253338	T/C	ENSSSCG00000016553	COPG2	Protein coding	Large White	Coster et al., 2012
rs81471172	18	51640938	C/T	ENSSSCG00000036443	HECW1	Protein coding	Large White	Y. Wang et al., 2018
rs81471381	18	53672799	A/G	ENSSSCG00000035581	SUGCT	Protein coding	Large White	Sell-Kubiak et al., 2015
rs332595701	18	53697787	A/G	ENSSSCG00000035581	SUGCT	Protein coding	Large White	Sell-Kubiak et al., 2015
rs81225238	X	15335129	G/T	ENSSSCG00000012157	PHKA2	Protein coding	Erhualian	He et al., 2017
rs80891661	X	101710962	T/C			Intergenic	Erhualian	He et al., 2017
rs322114058	X	101975674	G/A	ENSSSCG00000012644	TENM1	Protein coding	Erhualian	He et al., 2017

## Sheet: Table S2
Table S2. SNPs associated with number born alive in pigs with their location within pig genome (including chromosome - SSC, position and gene), alleles as well as breed in which the SNP was detected.
Refsnp ID	SSC	Position	Allele	Ensembl Gene ID	Gene name	Gene type	Breed	Author
	1	3792003	G/A			Intergenic	Yorkshire	Wu et al., 2018a
<rs332646065 (+5 N)	1	3859573	C/T			Intergenic	Yorkshire	Wu et al., 2018a
	1	4023577	A/G			Intergenic	Yorkshire	Wu et al., 2018a
	1	4151148	G/A			Intergenic	Yorkshire	Wu et al., 2018a
	1	4212653	A/G			Intergenic	Yorkshire	Wu et al., 2018a
	1	4317590	T/G			Intergenic	Yorkshire	Wu et al., 2018a
<rs711250132 (+ 22 N)	1	4742803	G/A	ENSSSCG00000004029	QKI	Protein coding	Yorkshire	Wu et al., 2018a
	1	4764990	A/G	ENSSSCG00000004029	QKI	Protein coding	Yorkshire	Wu et al., 2018a
	1	4891063	G/A			Intergenic	Yorkshire	Wu et al., 2018a
<rs791534314 (+13 N)	1	33444824	C/T			Intergenic	Yorkshire	Wu et al., 2018a
rs339929690	1	59515751	T/C			Intergenic	Landrace/Yorkshire	Wu et al., 2018b
rs329624627	1	72605122	C/T	ENSSSCG00000004371	CRYBG1	Protein coding	Landrace/Yorkshire	Wu et al., 2018b
rs329624627	1	72605122	G/A	ENSSSCG00000035339	U6	snRNA	Landrace/Yorkshire	Wu et al., 2018b
rs338462676	1	74750265	A/G	ENSSSCG00000004387	FOXO3	Protein coding	Landrace/Yorkshire	Wu et al., 2018b
<rs344017461 (+55 N)	1	79944180	G/A			Intergenic	Yorkshire	Wu et al., 2018a
	1	81986236	C/T				Yorkshire	Wu et al., 2018a
rs80982567	1	99668135	C/G	ENSSSCG00000004511	MYO5B	Protein coding	Landrace/Yorkshire	Wu et al., 2018b
	1	112749649	G/A		MYO1E	Protein coding	Landrace	Wu et al., 2018a
	1	113925836	G/A		ALDH1A2	Protein coding	Landrace	Wu et al., 2018a
	1	114013485	A/G		ALDH1A2	Protein coding	Landrace	Wu et al., 2018a
rs329761313	1	116715803	T/C			Intergenic	Landrace/Yorkshire	Wu et al., 2018b
rs329145797	1	116791808	C/T			Intergenic	Landrace/Yorkshire	Wu et al., 2018b
<rs703082285 (+5 N)	1	117560058	G/A		UNC13C	Protein coding	Landrace	Wu et al., 2018a
	1	121979211	C/T			Intergenic	Landrace	Wu et al., 2018a
	1	125098202	G/A			Intergenic	Landrace	Wu et al., 2018a
	1	138374779	C/T		MEF2A	Protein coding	Landrace	Wu et al., 2018a
rs80830052	1	139481542	G/A	ENSSSCG00000004822	ALDH1A3	Protein coding	Landace/Large White	Suwannasing et al., 2018
rs80930659	1	139579572	T/G	ENSSSCG00000004823	LRRK1	Protein coding	Landace/Large White	Suwannasing et al., 2018
rs80804265	1	139608452	G/A	ENSSSCG00000004823	LRRK1	Protein coding	Landace/Large White	Suwannasing et al., 2018
rs80804265	1	139608452	G/A	ENSSSCG00000048312		pseudogene	Landace/Large White	Suwannasing et al., 2018
rs80862569	1	139636710	T/C			Intergenic	Landace/Large White	Suwannasing et al., 2018
rs80846651	1	139655026	G/A			Intergenic	Landace/Large White	Suwannasing et al., 2018
rs341254142 (+6 N)	1	140493634	G/A		GABRA5	Protein coding	Landrace	Wu et al., 2018a
	1	140493634	T/C		GABRA5	Protein coding	Landrace	Wu et al., 2018a
rs81348779	1	141989297	C/G	ENSSSCG00000004832	UBE3A	Protein coding	Large White	Coster et al., 2012
	1	143611689	T/C			Intergenic	Landrace	Wu et al., 2018a
	1	143847344	G/T		TRPM1	Protein coding	Landrace	Wu et al., 2018a
rs329931325	1	144835089	A/T			Intergenic	Landrace/Yorkshire	Wu et al., 2018b
rs326961952	1	145395812	T/G			Intergenic	Landrace/Yorkshire	Wu et al., 2018b
rs336474421	1	145452726	C/T			Intergenic	Landrace/Yorkshire	Wu et al., 2018b
rs322202112	1	146334522	A/C			Intergenic	Landrace/Yorkshire	Wu et al., 2018b
rs332924521	1	239558816	C/T	ENSSSCG00000005368	XPA	Protein coding	Landrace/Yorkshire	Wu et al., 2018b
rs330585697	1	239775818	A/G	ENSSSCG00000005371	TRMO	Protein coding	Landrace/Yorkshire	Wu et al., 2018b
<rs1108903253 (+ 26 N)	1	248313036	A/G	ENSSSCG00000004441	DSE	Protein coding	Yorkshire	Wu et al., 2018a
	1	248830832	G/T			Intergenic	Yorkshire	Wu et al., 2018a
	1	251970186	A/G	ENSSSCG00000005457	LPAR1	Protein coding	Yorkshire	Wu et al., 2018a
	1	279332576	T/C			Intergenic	Yorkshire	Wu et al., 2018a
rs81291755	2	20563683	A/G			Intergenic	Landrace/Yorkshire	Suwannasing et al., 2018
rs81355894	2	20637563	A/C			Intergenic	Landrace/Yorkshire	Suwannasing et al., 2018
rs81355903	2	20665892	C/T			Intergenic	Landrace/Yorkshire	Suwannasing et al., 2018
rs81355915	2	20717076	A/G			Intergenic	Landrace/Yorkshire	Suwannasing et al., 2018
rs81356698	2	28380318	A/G	ENSSSCG00000013315	EIF3M	Protein coding	Large White	Coster et al., 2012
rs81356698	2	28380318	A/G	ENSSSCG00000022291	U6	snRNA	Large White	Coster et al., 2012
	2	41988642	C/T	ENSSSCG00000025406	PIK3C2A	Protein coding	Yorkshire	Wu et al., 2018a
	2	42521875	T/C	ENSSSCG00000034191	SOX6	Protein coding	Yorkshire	Wu et al., 2018a
	2	42939794	T/C	ENSSSCG00000034191	SOX6	Protein coding	Yorkshire	Wu et al., 2018a
	2	43271727	A/G			Intergenic	Yorkshire	Wu et al., 2018a
<rs695111531 (+ 13 N)	2	44475457	A/G		PDE3B	Protein coding	Yorkshire	Wu et al., 2018a
	2	45288322	C/T		SPON1	Protein coding	Yorkshire	Wu et al., 2018a
<rs330535420 (+12 N)	2	46731202	T/A			Intergenic	Yorkshire	Wu et al., 2018a
	2	84391979	G/A		HMGCR	Protein coding	Yorkshire	Wu et al., 2018a
	2	111333438	G/A			Intergenic	Landrace	Wu et al., 2018a
	2	111539604	G/T			Intergenic	Landrace	Wu et al., 2018a
	2	111570206	G/T			Intergenic	Landrace	Wu et al., 2018a
rs81265647	2	125660328	C/T	ENSSSCG00000014233		Protein coding	Landace/Large White	Suwannasing et al., 2018
rs81219883	2	134661167	C/T	ENSSSCG00000014280	RAD50		Large White	Sato et al. 2016
	3	19824347	G/T	ENSSSCG00000004121	FBXO30	Protein coding	Yorkshire	Wu et al., 2018a
rs81379421	3	27307613	A/G	ENSSSCG00000007872	XYLT1	Protein coding	Landace/Large White	Bergfelder-Druing et al., 2015
rs334867206	3	43312168	C/T			Intergenic	Large White	Y. Wang et al., 2018
rs319494663	3	43463318	C/T	ENSSSCG00000018319	ssc-let-7a-2	miRNA	Large White	Y. Wang et al., 2018
	3	47968571	A/G			Intergenic	Landrace	Wu et al., 2018a
	3	91357159	A/G			Intergenic	Landrace	Wu et al., 2018a
	4	87023333	C/T			Intergenic	Landrace	Wu et al., 2018a
	4	88927890	C/T	ENSSSCG00000006350		Intergenic	Landrace	Wu et al., 2018a
rs80927364	4	130597207	G/A	ENSSSCG00000040735	DDAH1	Protein coding	Erhualian	Ma et al., 2018
<rs327588667 (+ 8 N)	5	13043987	A/G	ENSSSCG00000000162	BTBD11	Protein coding	Yorkshire	Wu et al., 2018a
<rs793255189 (+15 n)	5	13149154	A/G			Intergenic	Yorkshire	Wu et al., 2018a
<rs321661690 (+ 9 N)	5	13229715	A/C			Intergenic	Yorkshire	Wu et al., 2018a
<rs346157265 ( - 6 N)	5	13354686	G/T	ENSSSCG00000000164	CRY1	Protein coding	Yorkshire	Wu et al., 2018a
<rs698730634 ( + 8 N)	5	13514549	G/A	ENSSSCG00000000167	RIC8B	Protein coding	Yorkshire	Wu et al., 2018a
<rs332263579 (+ 7 N)	5	13658216	T/C	ENSSSCG00000000169	POLR3B	Protein coding	Yorkshire	Wu et al., 2018a
	5	14483262	C/T			Intergenic	Yorkshire	Wu et al., 2018a
<rs334978289 (+11 N)	5	14570954	T/C			Intergenic	Yorkshire	Wu et al., 2018a
rs80890206	5	31022891	A/C	ENSSSCG00000000478	GRIP1	Protein coding	Erhualian	Ma et al., 2018
rs80867243	5	87337099	T/C	ENSSSCG00000023803	ELK3	Protein coding	Landace/Large White	Bergfelder-Druing et al., 2015
	5	107733529	T/C			Intergenic	Landrace	Wu et al., 2018a
rs81320475	6	70313133	C/A	ENSSSCG00000003400	NMNAT1	Protein coding	Landace/Large White	Suwannasing et al., 2018
rs81320475	6	70313133	C/A	ENSSSCG00000003399	RBP7	Protein coding	Landace/Large White	Suwannasing et al., 2018
rs81285644	6	70323076	T/G	ENSSSCG00000003399	RBP7	Protein coding	Landace/Large White	Suwannasing et al., 2018
rs81275494	6	70408106	T/G	ENSSSCG00000003398	UBE4B	Protein coding	Landace/Large White	Suwannasing et al., 2018
rs81279050	6	70418172	G/A	ENSSSCG00000003398	UBE4B	Protein coding	Landace/Large White	Suwannasing et al., 2018
rs81270030	6	70428427	C/T	ENSSSCG00000003398	UBE4B	Protein coding	Landace/Large White	Suwannasing et al., 2018
rs81388928	6	80201311	C/T			Intergenic	Duroc	Chen et al., 2019
rs81388947	6	80229040	G/A			Intergenic	Duroc	Chen et al., 2019
rs704072370	6	80388745	G/A			Intergenic	Duroc	Chen et al., 2019
rs81332505	6	83142163	G/A	ENSSSCG00000023235	MAN1C1	Protein coding	Duroc	Chen et al., 2019
rs81476037	6	83545020	C/T	ENSSSCG00000030660	PDIK1L	Protein coding	Duroc	Chen et al., 2019
rs328276462	6	83863384	G/A	ENSSSCG00000033516	DHDDS	Protein coding	Duroc	Chen et al., 2019
rs328276462	6	83863384	C/T	ENSSSCG00000003555	HMGN2	Protein coding	Duroc	Chen et al., 2019
rs335265547	6	83871998	A/C			Intergenic	Duroc	Chen et al., 2019
rs81287462	6	83986459	G/A			Intergenic	Duroc	Chen et al., 2019
rs81332455	6	84069079	A/G	ENSSSCG00000003559	ARID1A	Protein coding	Duroc	Chen et al., 2019
rs336670754	6	84118086	G/A	ENSSSCG00000003559	ARID1A	Protein coding	Duroc	Chen et al., 2019
	6	146651626	C/T	ENSSSCG00000003805	PDE4B	Protein coding	Yorkshire	Wu et al., 2018a
	6	146757489	G/T		<LEPR (+ 41490 N)	Protein coding	Yorkshire	Wu et al., 2018a
	6	146788750	G/A		<LEPR (+ 10229 N)	Protein coding	Yorkshire	Wu et al., 2018a
	6	146824657	G/A	ENSSSCG00000025188	LEPR	Protein coding	Yorkshire	Wu et al., 2018a
	6	146902183	T/C		<LEPR (- 103204 N)	Protein coding	Yorkshire	Wu et al., 2018a
<rs336754701 ( + 38 N)	6	146988752	A/G			Intergenic	Yorkshire	Wu et al., 2018a
	6	147041899	C/T	ENSSSCG00000003807	DNAJC6	Protein coding	Yorkshire	Wu et al., 2018a
	6	147065275	A/G	ENSSSCG00000003807	DNAJC6	Protein coding	Yorkshire	Wu et al., 2018a
	6	147208982	C/T	ENSSSCG00000040337	AK4	Protein coding	Yorkshire	Wu et al., 2018a
<rs1112087213 (+ 11 N)	6	147402993	A/G			Intergenic	Yorkshire	Wu et al., 2018a
rs342908929	6	159933806	C/T	ENSSSCG00000003863	ZFYVE9	Protein coding	Yorkshire	Li et al., 2020
rs81345088	6	168897980	G/A	ENSSSCG00000003967	ZMYND12	Protein coding	Commercia	Suwannasing et al., 2018
rs81259198	6	168899114	G/A	ENSSSCG00000003967	ZMYND12	Protein coding	Landace/Large White	Suwannasing et al., 2018
rs81245903	6	168916590	G/T	ENSSSCG00000003968	RIMKLA	Protein coding	Landace/Large White	Suwannasing et al., 2018
rs81273774	6	168931165	T/C	ENSSSCG00000003968	RIMKLA	Protein coding	Landace/Large White	Suwannasing et al., 2018
rs80882306	7	11003222	A/G	ENSSSCG00000042180		Protein coding	Erhualian	Ma et al., 2018
<rs705986590 (+ 14 N)	7	30669934	C/T		<ILRUN (-108185 N)	Protein coding	Yorkshire	Wu et al., 2018a
	7	30918403	C/T	ENSSSCG00000001534	ANKS1A	Intergenic	Yorkshire	Wu et al., 2018a
	7	58411951	C/T			Intergenic	Yorkshire	Wu et al., 2018a
<rs329891258 (+ 8 N)	7	69756591	C/T		PRKD1	Protein coding	Yorkshire	Wu et al., 2018a
rs325729252	7	109101108	T/C			Intergenic	Landace/Large White	Bergfelder-Druing et al., 2015
	8	14112531	C/T			Intergenic	Yorkshire	Wu et al., 2018a
rs786732979 (+ 6N)	8	84823302	C/A		INPP4B	Protein coding	Landrace	Wu et al., 2018a
	8	84901664	C/T		INPP4B	Protein coding	Landrace	Wu et al., 2018a
rs318557169	8	95381096	C/G			Intergenic	Landrace/Yorkshire	Wu et al., 2018b
rs327655683	8	95402330	C/A			Intergenic	Landrace/Yorkshire	Wu et al., 2018b
<rs340919068 ( +18 N)	8	123383045	T/C			Intergenic	Yorkshire	Wu et al., 2018a
rs81214162	8	131078336	G/A		SPP1-201 (OPN)	Protein coding	Large White	Kumchoo and Mekchay, 2015
rs81509053	8	131079315	A/G		SPP1-201 (OPN)	Protein coding	Large White	Kumchoo and Mekchay, 2015
rs81509049	8	131079463	C/T		SPP1-201 (OPN)	Protein coding	Large White	Kumchoo and Mekchay, 2015
rs81257618	9	13492371	G/A			Intergenic	Landace/Large White	Bergfelder-Druing et al., 2015
<rs701993088 (+ 20 N)	9	20571611	G/A	ENSSSCG00000008762	STIM2	Protein coding	Yorkshire	Wu et al., 2018a
	9	61226032	G/A			Intergenic	Yorkshire	Wu et al., 2018a
rs81417393	9	126541658	T/C			Intergenic	Landace/Large White	Bergfelder-Druing et al., 2015
	9	138766097	A/G			Intergenic	Landrace	Wu et al., 2018a
	9	143554876	G/A			Intergenic	Landrace	Wu et al., 2018a
rs81421148	10	16506621	A/C	ENSSSCG00000010872	AKT3	Protein coding	Landace/Large White	Bergfelder-Druing et al., 2015
rs80978601	10	25256004	A/G			Intergenic	Landace/Large White	Bergfelder-Druing et al., 2015
rs81255997	10	28330355	T/C			Intergenic	Landace/Large White	Bergfelder-Druing et al., 2015
<rs706369176 ( +14)	10	32050819	C/T		CCL21	Protein coding	Yorkshire	Wu et al., 2018a
	10	51490004	T/C			Intergenic	Yorkshire	Wu et al., 2018a
rs81274366	10	57593745	A/G	ENSSSCG00000011103	PARD3	Protein coding	Erhualian	Ma et al., 2018
rs81236069	10	58288430	G/A			Intergenic	Landace/Large White	Bergfelder-Druing et al., 2015
rs81302230	10	58290108	A/G			Intergenic	Landace/Large White	Bergfelder-Druing et al., 2015
	10	61465224	T/G			Intergenic	Yorkshire	Wu et al., 2018a
	10	77226276	G/A			Intergenic	Yorkshire	Wu et al., 2018a
rs81430147	11	836702	T/C			Intergenic	Landace/Large White	Bergfelder-Druing et al., 2015
rs81430859	11	4296303	T/C	ENSSSCG00000009300	WASF3	Protein coding	Landace/Large White	Bergfelder-Druing et al., 2015
rs81430859	11	4296303	T/C	ENSSSCG00000042074		pseudogene	Landace/Large White	Bergfelder-Druing et al., 2015
	11	16554348	T/C			Intergenic	Yorkshire	Wu et al., 2018a
rs793602339 (+6 N)	11	49265478	A/G		MYCBP2	Protein coding	Landrace	Wu et al., 2018a
rs81242222	11	67129570	G/A			Intergenic	Landace/Large White	Bergfelder-Druing et al., 2015
rs81434499	12	36207006	T/G			Intergenic	Erhualian	Ma et al., 2018
	13	385950	T/C	ENSSSCG00000011178	CPNE4	Protein coding	Yorkshire	Wu et al., 2018a
rs80962240	13	52784022	T/C	ENSSSCG00000027675	FOXP1	Protein coding	Large White	Y. Wang et al., 2018
rs81215583	13	71905692	T/C	ENSSSCG00000011612	RPN1	Protein coding	Erhualian	Ma et al., 2018
rs81447100	13	80866929	G/A	ENSSSCG00000011666	CLSTN2	Protein coding	Erhualian	Ma et al., 2018
rs81447231	13	82603578	G/A	ENSSSCG00000011675	GRK7	Protein coding	Erhualian	Ma et al., 2018
<rs323289467 (+ 1 N)	13	196698221	T/A			Intergenic	Yorkshire	Wu et al., 2018a
	14	11299682	G/A		EPHX2	Protein coding	Landrace	Wu et al., 2018a
rs326833930	14	97104078	T/C	ENSSSCG00000029281		Protein coding	Large White	He et al., 2017
rs319258722	14	123766842	C/T			Intergenic	Large White	Y. Wang et al., 2018
	14	147592530	T/G			Intergenic	Landrace	Wu et al., 2018a
	14	147646167	A/G			Intergenic	Landrace	Wu et al., 2018a
	14	147794697	A/G			Intergenic	Landrace	Wu et al., 2018a
	15	1242170	G/A			Intergenic	Landrace	Wu et al., 2018a
rs81454514	15	117844034	C/T			Intergenic	Yorkshire	Uzzaman et al., 2018
rs45435330	15	118847390	G/A	ENSSSCG00000035392	IGFBP2	Protein coding	Berkshire	An et al., 2018
	15	135381814	C/T		<AGAP1 (+ 60092 N)	Protein coding	Yorkshire	Wu et al., 2018a
<rs322435991 (+10 N)	16	5197665	G/A		<FBXL7 (- 3476 N)	Protein coding	Yorkshire	Wu et al., 2018a
rs81459590	16	6025546	G/A	ENSSSCG00000016794	MYO10	Protein coding	Landace/Large White	Bergfelder-Druing et al., 2015
	16	45655718	G/T			Intergenic	Yorkshire	Wu et al., 2018a
	16	46169204	T/C			Intergenic	Yorkshire	Wu et al., 2018a
	16	46221484	T/C			Intergenic	Yorkshire	Wu et al., 2018a
	16	53636710	A/G	ENSSSCG00000017003	KCNIP1	Protein coding	Yorkshire	Wu et al., 2018a
	16	71499601	A/G		FAT2	Protein coding	Landrace	Wu et al., 2018a
<rs342335040 (+ 7 N)	17	3579607	C/T			Intergenic	Yorkshire	Wu et al., 2018a
<rs334643879 ( +18 N)	17	4557634	C/T			Intergenic	Yorkshire	Wu et al., 2018a
	17	18968826	G/A	ENSSSCG00000007063	ANKEF1	Intergenic	Yorkshire	Wu et al., 2018a
	17	19087803	T/G		<SNAP25 (+ 8337 N)	Protein coding	Yorkshire	Wu et al., 2018a
	17	20150170	C/T			Intergenic	Yorkshire	Wu et al., 2018a
	17	21425358	T/C			Intergenic	Yorkshire	Wu et al., 2018a
rs80952566	17	27123793	T/G			Intergenic	Erhualian	Ma et al., 2018
	18	25781740	C/T	ENSSSCG00000016618	CPED1	Protein coding	Yorkshire	Wu et al., 2018a
rs81469701	18	42920811	C/T	ENSSSCG00000016682	PLEKHA8	Protein coding	Landace/Large White	Bergfelder-Druing et al., 2015
rs81469701	18	42920811	C/T	ENSSSCG00000016684	SCRN1	Protein coding	Landace/Large White	Bergfelder-Druing et al., 2015
rs81471172	18	51640938	C/T	ENSSSCG00000036443	HECW1	Protein coding	Large White	Y. Wang et al., 2018
rs81473442	X	91880535	T/C	ENSSSCG00000012587	TRPC5	Protein coding	Landace/Large White	Suwannasing et al., 2018
rs81323503	X	92070342	T/C			Intergenic	Landace/Large White	Suwannasing et al., 2018
rs81283192	X	92244402	G/A	ENSSSCG00000012589	RTL4	Protein coding	Landace/Large White	Suwannasing et al., 2018
rs337547716	X	92330719	A/G	ENSSSCG00000012589	RTL4	Protein coding	Landace/Large White	Suwannasing et al., 2018
rs80834138	X	92447181	C/A	ENSSSCG00000012590	LHFPL1	Protein coding	Landace/Large White	Suwannasing et al., 2018
rs81339510	X	118854990	G/T			Intergenic	Landace/Large White	Suwannasing et al., 2018

## Sheet: Table S3
Table S3. SNPs associated with number of stillborn in pigs with their location within pig genome (including chromosome - SSC, position and gene), alleles as well as breed in which the SNP was detected.
Refsnp ID	SSC	Position	Allele	Ensembl Gene ID	Gene name	Gene type	Breed	Author
rs80808080	1	19431800	G/T	ENSSSCG00000004119	GRM1	protein coding	Duroc	Chen et al., 2019
rs80920412	1	19542020	A/C	ENSSSCG00000004119	GRM1	protein coding	Duroc	Chen et al., 2019
rs81416335	1	81163478	C/T			Intergenic	Large White /Landrace	Onteru et al., 2012
rs81322865	1	159785087	C/T			Intergenic	Duroc	Chen et al., 2019
rs80932914	1	160005977	T/C	ENSSSCG00000004903	CDH20	protein coding	Duroc	Chen et al., 2019
rs80946859	1	166083413	A/G	ENSSSCG00000004958	PIAS1	protein coding	Large White	Verardo et al., 2016
rs80939464	1	174008560	T/C			Intergenic	Duroc/Yorkshire/Landrace	Schneider et al., 2015
rs80939464	1	174008560				Intergenic	Large White	Verardo et al., 2016
rs80797899	1	184142784	A/G	ENSSSCG00000023408	SAMD4A	protein coding	Large White	Verardo et al., 2016
rs81349835	1	184421568	A/G	ENSSSCG00000005054	MAPK1IP1L	protein coding	Duroc/Yorkshire/Landrace	Schneider et al., 2015
rs81349835	1	184421568	A/G	ENSSSCG00000005054	MAPK1IP1L	protein coding	Large White	Verardo et al., 2016
rs81246297	1	184465493	A/G			Intergenic	Large White	Verardo et al., 2016
rs81349840	1	184542409	G/A	ENSSSCG00000005056	DLGAP5	protein coding	Large White	Verardo et al., 2016
rs80975193	1	248453696	C/A	ENSSSCG00000005436	RAD23B	protein coding	Duroc/Yorkshire/Landrace	Schneider et al., 2015
rs80925497	1	248501240	A/G			Intergenic	Duroc/Yorkshire/Landrace	Schneider et al., 2015
rs81243637	2	2119793	T/C	ENSSSCG00000012856	NAP1L4	protein coding	Duroc	Chen et al., 2019
rs81318741	2	2594130	A/C	ENSSSCG00000033043	SHANK2	protein coding	Duroc	Chen et al., 2019
rs81334678	2	3344856	G/A	ENSSSCG00000024158	ANO1	protein coding	Large White /Landrace	Onteru et al., 2012
rs81240468	2	26426103	C/T				Duroc	Chen et al., 2019
rs81240468	2	26426103	C/T			Intergenic	Duroc	Chen et al., 2019
rs319326484	2	26640771	T/G	ENSSSCG00000013303	ABTB2	protein coding	Duroc	Chen et al., 2019
rs81360334	2	85664532	A/G			Intergenic	Large White	Verardo et al., 2016
rs81360405	2	86008048	A/G	ENSSSCG00000014094	AGGF1	protein coding	Large White	Verardo et al., 2016
rs81360405	2	86008048	A/G	ENSSSCG00000014097	PDE8B	protein coding	Large White	Verardo et al., 2016
rs81275457	2	86112967	G/T	ENSSSCG00000014097		protein coding	Duroc/Yorkshire/Landrace	Schneider et al., 2015
rs81275457	2	86112967	G/T	ENSSSCG00000014097		protein coding	Large White	Verardo et al., 2016
rs81360673	2	87434796	T/C	ENSSSCG00000028536	LHFPL	protein coding	Large White	Verardo et al., 2016
rs81360673	2	87434796	T/C	ENSSSCG00000028536	LHFPL2	protein coding	Landrace	Uimari et al., 2011
rs80971423	2	123144535	C/A	ENSSSCG00000027857	DMXL1	protein coding	Large White /Landrace	Onteru et al., 2012
rs81369577	3	46321828	A/G	ENSSSCG00000008111	NPHP1	protein coding	Large White	Verardo et al., 2016
rs80984737	4	20753096	A/G	ENSSSCG00000006009	EXT1	protein coding	Duroc	Chen et al., 2019
rs80814230	4	85364305	T/G				Duroc	Chen et al., 2019
rs80954640	4	85672340	T/C				Duroc	Chen et al., 2019
rs80873805	4	85857464	A/G	ENSSSCG00000006331	PBX1	protein coding	Duroc	Chen et al., 2019
rs80984294	4	85997914	C/T	ENSSSCG00000006331	PBX1	protein coding	Duroc	Chen et al., 2019
rs80919869	4	86706282	G/A			Intergenic	Duroc	Chen et al., 2019
rs80905406	4	86942806	C/T			Intergenic	Duroc	Chen et al., 2019
rs80794878	4	117558458	G/T			Intergenic	Duroc	Chen et al., 2019
rs81389536	6	88399987	G/A			Intergenic	Large White	Verardo et al., 2016
rs327385898	7	69618395	A/G	ENSSSCG00000001975	PRKD1	protein coding	Duroc	Chen et al., 2019
rs80951368	7	69663669	G/A	ENSSSCG00000001975	PRKD1	protein coding	Duroc	Chen et al., 2019
rs80826231	7	69719860	T/G	ENSSSCG00000001975	PRKD1	protein coding	Duroc	Chen et al., 2019
rs80867005	7	69747754	G/A	ENSSSCG00000001975	PRKD1	protein coding	Duroc	Chen et al., 2019
rs81398104	7	70602805	G/A			Intergenic	Duroc	Chen et al., 2019
rs81001174	7	71301362	T/C			Intergenic	Duroc	Chen et al., 2019
rs80990939	7	71829092	C/T			Intergenic	Duroc	Chen et al., 2019
rs326087817	7	71926170	C/A			Intergenic	Duroc	Chen et al., 2019
rs80848218	7	71941528	C/T			Intergenic	Duroc	Chen et al., 2019
rs331730550	7	73134134	A/G			Intergenic	Duroc	Chen et al., 2019
rs331569078	7	73186677	C/T			Intergenic	Duroc	Chen et al., 2019
rs333378103	7	73752763	A/G	ENSSSCG00000050981		pseudogene	Duroc	Chen et al., 2019
rs80836389	7	73776679	T/C			Intergenic	Duroc	Chen et al., 2019
rs80824189	7	73999704	C/T			Intergenic	Duroc	Chen et al., 2019
rs80786023	7	74216634	A/G			Intergenic	Duroc	Chen et al., 2019
rs80807642	7	74264086	C/T			Intergenic	Duroc	Chen et al., 2019
rs81398112	7	74302403	A/G	ENSSSCG00000001977	STXBP6	protein coding	Duroc	Chen et al., 2019
rs81295302	7	74333495	C/T	ENSSSCG00000001977	STXBP6	protein coding	Duroc	Chen et al., 2019
rs80882413	7	74361081	T/C	ENSSSCG00000001977	STXBP6	protein coding	Duroc	Chen et al., 2019
rs80927277	7	74841860	A/G			Intergenic	Duroc	Chen et al., 2019
rs80853349	7	74920040	A/G	ENSSSCG00000001986	NFATC4	protein coding	Duroc	Chen et al., 2019
rs80978856	7	75755441	A/G	ENSSSCG00000002023	PABPN1	protein coding	Duroc	Chen et al., 2019
rs80829839	7	75778619	T/C	ENSSSCG00000032977	PPP1R3E	protein coding	Duroc	Chen et al., 2019
rs81402736	8	99932102	A/G			Intergenic	Large White /Landrace	Onteru et al., 2012
rs81432173	11	11365189	C/T	ENSSSCG00000034348	NBEA	protein coding	Duroc/Yorkshire/Landrace	Schneider et al., 2015
rs331116712	12	32089090	G/A	ENSSSCG00000017608		protein coding	Duroc	Chen et al., 2019
rs330355654	12	32171144	A/G			Intergenic	Duroc	Chen et al., 2019
rs322976321	12	60834034	A/G	ENSSSCG00000038164	RAI1	protein coding	Duroc	Chen et al., 2019
rs80813451	13	47034430	G/A	ENSSSCG00000011497	MAGI1	protein coding	Duroc/Yorkshire/Landrace	Schneider et al., 2015
rs81445601	13	51344697	C/T	ENSSSCG00000011514	MITF	protein coding	Duroc/Yorkshire/Landrace	Schneider et al., 2015
rs81451849	15	21432640	A/C	ENSSSCG00000015711	DPP10	protein coding	Duroc/Yorkshire/Landrace	Schneider et al., 2015
rs81451891	15	22571234	A/G			Intergenic	Duroc/Yorkshire/Landrace	Schneider et al., 2015
rs326006477	15	71567909	C/T	ENSSSCG00000015903	SLC38A11	protein coding	Duroc/Yorkshire/Landrace	Schneider et al., 2015
rs81453506	15	72382359	G/A			Intergenic	Large White /Landrace	Onteru et al., 2012
rs80983703	15	74462028	G/A	ENSSSCG00000022496	STK39	protein coding	Duroc/Yorkshire/Landrace	Schneider et al., 2015
rs81453540	15	75063953	A/G	ENSSSCG00000032715	CERS6	protein coding	Large White /Landrace	Onteru et al., 2012
rs81453786	15	81163478	C/T			Intergenic	Landrace	Uimari et al., 2011
rs81453786	15	81163478	C/T			Intergenic	Large White	Verardo et al., 2016
rs80982646	15	100099175	T/C			Intergenic	Large White	Verardo et al., 2016
rs80951233	15	100127486	A/G			Intergenic	Large White	Verardo et al., 2016
rs80938315	15	126783059	T/C			Intergenic	Duroc/Yorkshire/Landrace	Schneider et al., 2015
rs81457457	16	24798218	A/G			Intergenic	Large White	Verardo et al., 2016
rs80976648	17	55079324	C/T			Intergenic	Large White	Verardo et al., 2016
rs80842245	17	55108240	A/C	ENSSSCG00000007486	CYP24A1	protein coding	Large White	Verardo et al., 2016
rs323589897	X	113665680	T/C	ENSSSCG00000022331	FGF13	protein coding	Duroc	Chen et al., 2019

## Sheet: Table S4
Table S4. SNPs associated with litter birthweight in pigs with their location within pig genome (including chromosome, position and gene), alleles as well as breed in which the SNP was detected.
Refsnp ID	SSC	Position	Allele	Ensembl Gene ID	Gene name	Gene type	Breed	Author
rs325089329	4	5914423	A/G			Intergenic	Duroc	Zhang et al., 2019
rs329734169	4	5928319	A/G			Intergenic	Duroc	Zhang et al., 2019
rs80808642	4	7472267	T/C			Intergenic	Duroc	Zhang et al., 2019
rs81326131	6	80741615	A/G			Intergenic	Duroc	Zhang et al., 2019
rs81476258	6	80742667	T/C	ENSSSCG00000003527	EPHB2	protein coding	Duroc	Zhang et al., 2019
rs344228120	7	5109979	T/C	ENSSSCG00000001027	BMP6	protein coding	Yorkshire	Li et al., 2020
rs81427863	10	5150788	G/A			Intergenic	Duroc	Zhang et al., 2019
rs322567083	10	5177966	T/C			Intergenic	Duroc	Zhang et al., 2019
rs81428034	10	5207757	T/C			Intergenic	Duroc	Zhang et al., 2019
rs332491771	14	962165	T/C	ENSSSCG00000009584	SEMA4D	protein coding	Duroc	Zhang et al., 2019
rs328230332	17	34329730	C/T			Intergenic	Duroc	Zhang et al., 2019
rs81472303	18	18253338	T/C	ENSSSCG00000016553	COPG2	protein coding	Large White	Coster et al., 2012

## Sheet: Table S5
Table S5. SNPs associated with corpus luteum number in pigs with their location within pig genome (including chromosome, position and gene), alleles as well as breed in which the SNP was detected.
Refsnp ID	SSC	Position	Allele	Ensembl Gene ID	Gene name	Gene type	Breed	Author
rs80814798	1	13803972	C/T	ENSSSCG00000004081			Landrace x Duroc	Schneider et al., 2014
rs80989619	1	13891308	A/C	ENSSSCG00000004081			Landrace x Duroc	Schneider et al., 2014
rs80844123	1	184120498	A/G	ENSSSCG00000023408	SAMD4A		Landrace x Duroc	Schneider et al., 2014
rs80940225	1	184318941	T/G	ENSSSCG00000005052	WDHD1		Landrace x Duroc	Schneider et al., 2014
rs80836297	1	263752535	A/G	ENSSSCG00000038554	PDCL		Landrace x Duroc	Schneider et al., 2014
rs81352517	1	266908567	T/G			Intergenic	Landrace x Duroc	Schneider et al., 2014
rs80961867	1	267096450	T/C	ENSSSCG00000036926	MVB12B		Landrace x Duroc	Schneider et al., 2014
rs81364878	2	131685721	C/T				Landrace x Duroc	Schneider et al., 2014
rs81364901	2	131780589	G/A	ENSSSCG00000014257	SLC27A6	protein coding	Landrace x Duroc	Schneider et al., 2014
rs81365022	2	132579889	T/C	ENSSSCG00000035069	CHSY3	protein coding	Landrace x Duroc	Schneider et al., 2014
rs340050054	2	132695833	T/C	ENSSSCG00000035069	CHSY3		Landrace x Duroc	Schneider et al., 2014
rs81365382	2	134598604	T/C	ENSSSCG00000014275		Intergenic	Landrace x Duroc	Schneider et al., 2014
rs81232963	2	135005920	C/T	ENSSSCG00000014283	KIF3A		Landrace x Duroc	Schneider et al., 2014
rs81365483	2	135112289	A/G			Intergenic	Landrace x Duroc	Schneider et al., 2014
rs81366456	2	141941332	C/T	ENSSSCG00000014361			Landrace x Duroc	Schneider et al., 2014
rs81474857	2	142140516	A/G	ENSSSCG00000014363	SLC4A9		Landrace x Duroc	Schneider et al., 2014
rs81367062	2	145959095	A/G	ENSSSCG00000032826	KCTD16	protein coding	Landrace x Duroc	Schneider et al., 2014
rs81367088	2	146274062	T/C			Intergenic	Landrace x Duroc	Schneider et al., 2014
rs81367179	2	146737278	T/G				Landrace x Duroc	Schneider et al., 2014
rs81367208	2	146880995	C/T			Intergenic	Landrace x Duroc	Schneider et al., 2014
rs81230403	6	159720088	A/C	ENSSSCG00000003859	TUT4		Landrace x Duroc	Schneider et al., 2014
rs81393705	6	159983993	C/T	ENSSSCG00000003863	ZFYVE9		Landrace x Duroc	Schneider et al., 2014
rs80901924	17	57304842	C/T			protein coding	Landrace x Duroc	Schneider et al., 2014
rs80842382	18	52926622	T/C				Landrace x Duroc	Schneider et al., 2014

## Sheet: References
No.	Full references presented in Tables S1-S5
1	An, S. M., J. H. Hwang, S. Kwon, G. E. Yu, D. H. Park, D. G. Kang, T. W. Kim, H. C. Park, J. Ha, and C. W. Kim. 2018. Effect of Single Nucleotide Polymorphisms in IGFBP2 and IGFBP3 Genes on Litter Size Traits in Berkshire Pigs. Anim. Biotechnol. 29:301–308. doi:10.1080/10495398.2017.1395345.
2	Bergfelder-Drüing, S., C. Grosse-Brinkhaus, B. Lind, M. Erbe, K. Schellander, H. Simianer, and E. Tholen. 2015. A genome-wide association study in large white and landrace pig populations for number piglets born alive. PLoS One. 10:1–19. doi:10.1371/journal.pone.0117468.
3	Chen, Z., S. Ye, J. Teng, S. Diao, X. Yuan, Zanmou Chen, H. Zhang, J. Li, and Z. Zhang. 2019. Genome-wide association studies for the number of animals born alive and dead in duroc pigs. Theriogenology. 139:36–42. doi:10.1016/j.theriogenology.2019.07.013.
4	Coster, A., O. Madsen, H. C. M. Heuven, B. Dibbits, M. A. M. Groenen, J. A. M. van Arendonk, and H. Bovenhuis. 2012. The imprinted gene DIO3 is a candidate gene for litter size in pigs. PLoS One. 7:e31825; 10.1371/journal.pone.0031825. doi:10.1371/journal.pone.0031825.
5	He, L. C., P. H. Li, X. Ma, S. P. Sui, S. Gao, S. W. Kim, Y. Q. Gu, Y. Huang, N. S. Ding, and R. H. Huang. 2017. Identification of new single nucleotide polymorphisms affecting total number born and candidate genes related to ovulation rate in Chinese Erhualian pigs. Anim. Genet. 48:48–54. doi:10.1111/age.12492.
6	Kumchoo, T., and S. Mekchay. 2015. Association of non-synonymous SNPs of OPN gene with litter size traits in pigs. Arch. Tierzucht. 58:317–323. doi:10.5194/aab-58-317-2015.
7	Li, Xinjian, J. Ye, X. Han, R. Qiao, Xiuling Li, G. Lv, and K. Wang. 2020. Whole-genome sequencing identifies potential candidate genes for reproductive traits in pigs. Genomics. 112:199–206. doi:10.1016/j.ygeno.2019.01.014. Available from: https://doi.org/10.1016/j.ygeno.2019.01.014
8	Liu, C., X. Ran, C. Yu, Q. Xu, X. Niu, P. Zhao, and J. Wang. 2019. Whole-genome analysis of structural variations between Xiang pigs with larger litter sizes and those with smaller litter sizes. Genomics. 111:310–319. doi:10.1016/j.ygeno.2018.02.005.
9	Ma, X., P. H. Li, M. X. Zhu, L. C. He, S. P. Sui, S. Gao, G. S. Su, N. S. Ding, Y. Huang, Z. Q. Lu, X. G. Huang, and R. H. Huang. 2018. Genome-wide association analysis reveals genomic regions on Chromosome 13 affecting litter size and candidate genes for uterine horn length in Erhualian pigs. Animal. 12:2453–2461. doi:10.1017/S1751731118000332.
10	Onteru, S. K., B. Fan, Z. Q. Du, D. J. Garrick, K. J. Stalder, and M. F. Rothschild. 2012. A whole-genome association study for pig reproductive traits. Anim. Genet. 43:18–26. doi:10.1111/j.1365-2052.2011.02213.x.
11	Sato, S., T. Kikuchi, Y. Uemoto, S. Mikawa, and K. Suzuki. 2016. Effect of candidate gene polymorphisms on reproductive traits in a Large White pig population. Anim. Sci. J. 87:1455–1463. doi:10.1111/asj.12580.
12	Schneider, J. F., D. J. Nonneman, R. T. Wiedmann, J. L. Vallet, and G. A. Rohrer. 2014. Genomewide association and identification of candidate genes for ovulation rate in swine. J. Anim. Sci. 92:3792–3803. doi:10.2527/jas.2014-7788.
13	Schneider, J. F., J. R. Miles, T. M. Brown-Brandl, J. A. Nienaber, G. A. Rohrer, and J. L. Vallet. 2015. Genomewide association analysis for average birth interval and stillbirth in swine. J. Anim. Sci. 93:529–540. doi:10.2527/jas.2014-7899.
14	Sell-Kubiak, E., N. Duijvesteijn, M. S. Lopes, L. L. G. Janss, E. F. Knol, P. Bijma, and H. A. Mulder. 2015. Genome-wide association study reveals novel loci for litter size and its variability in a Large White pig population. BMC Genomics. 16:1049; 10.1186/s12864-015-2273-y.
15	Suwannasing, R., M. Duangjinda, W. Boonkum, R. Taharnklaew, and K. Tuangsithtanon. 2018. The identification of novel regions for reproduction trait in Landrace and Large White pigs using a single step genome-wide association study. Asian-Australasian J. Anim. Sci. 31:1852–1862. doi:10.5713/ajas.18.0072.
16	Uimari, P., A. Sironen, and M. L. Sevón-Aimonen. 2011. Whole-genome SNP association analysis of reproduction traits in the Finnish Landrace pig breed. Genet. Sel. Evol. 43:42. doi:10.1186/1297-9686-43-42.
17	Uzzaman, M. R., J. E. Park, K. T. Lee, E. S. Cho, B. H. Choi, and T. H. Kim. 2018. A genome-wide association study of reproductive traits in a Yorkshire pig population. Livest. Sci. 209:67–72. doi:10.1016/j.livsci.2018.01.005.
18	Verardo, L. L., F. F. Silva, M. S. Lopes, O. Madsen, J. W. M. Bastiaansen, E. F. Knol, M. Kelly, L. Varona, P. S. Lopes, and S. E. F. Guimarães. 2016. Revealing new candidate genes for reproductive traits in pigs: Combining Bayesian GWAS and functional pathways. Genet. Sel. Evol. 48:1–13. doi:10.1186/s12711-016-0189-x.
19	Wang, H., S. Wu, J. Wu, S. Sun, S. Wu, and W. Bao. 2018. Association analysis of the SNP (rs345476947) in the FUT2 gene with the production and reproductive traits in pigs. Genes and Genomics. 40:199–206. doi:10.1007/s13258-017-0623-7.
20	Wang, Y., X. Ding, Z. Tan, K. Xing, T. Yang, Y. Pan, Y. Wang, S. Mi, D. Sun, and C. Wang. 2018. Genome-wide association study for reproductive traits in a Large White pig population. Anim. Genet. 49:127–131. doi:10.1111/age.12638.
21	Wu, P., K. Wang, Q. Yang, J. Zhou, D. Chen, J. Ma, Q. Tang, L. Jin, W. Xiao, A. Jiang, Y. Jiang, L. Zhu, M. Li, X. Li, and G. Tang. 2018a. Identifying SNPs and candidate genes for three litter traits using single-step GWAS across six parities in landrace and large white pigs. Physiol. Genomics. 50:1026–1035. doi:10.1152/physiolgenomics.00071.2018.
22	Wu, P., Q. Yang, K. Wang, J. Zhou, J. Ma, Q. Tang, L. Jin, W. Xiao, A. Jiang, Y. Jiang, L. Zhu, X. Li, and G. Tang. 2018b. Single step genome-wide association studies based on genotyping by sequence data reveals novel loci for the litter traits of domestic pigs. Genomics. 110:171–179. doi:10.1016/j.ygeno.2017.09.009.
23	Zhang, Z., Zitao Chen, S. Ye, Y. He, S. Huang, X. Yuan, Zanmou Chen, H. Zhang, and J. Li. 2019. Genome‐wide association study for reproductive traits in a Duroc pig population. Animals. 9. doi:10.3390/ani9100732.
